# Supplementary material
Source: PubMed Central journal article supplement (PMC10843551)
Supplement: NIHMS1954798-supplement-1.pdf [file NIHMS1954798-supplement-1.pdf]

**Supplemental information**

**NK cells propagate T cell immunity  
following *in situ* tumor vaccination**

**Won Jong Jin, Justin C. Jagodinsky, Jessica M. Vera, Paul A. Clark, Cindy L. Zuleger, Amy K. Erbe, Irene M. Ong, Trang Le, Kaitlin Tetreault, Tracy Berg, Alexander L. Rakhmilevich, KyungMann Kim, Michael A. Newton, Mark R. Albertini, Paul M. Sondel, and Zachary S. Morris**

A

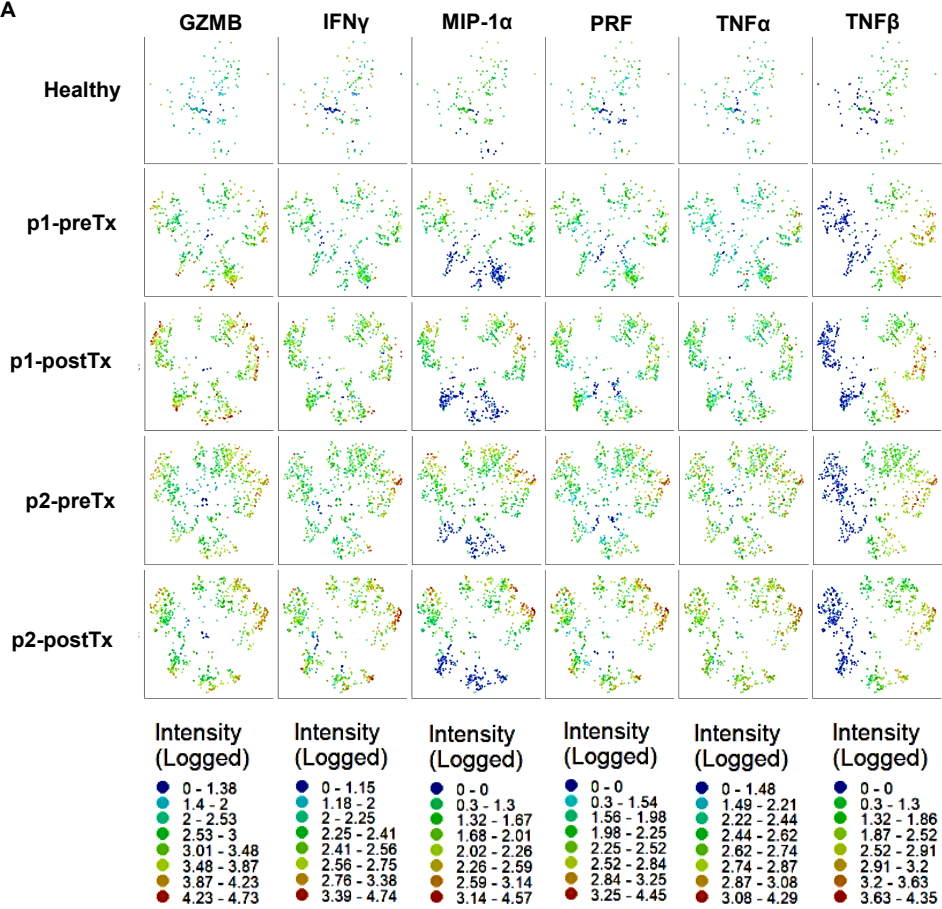

B

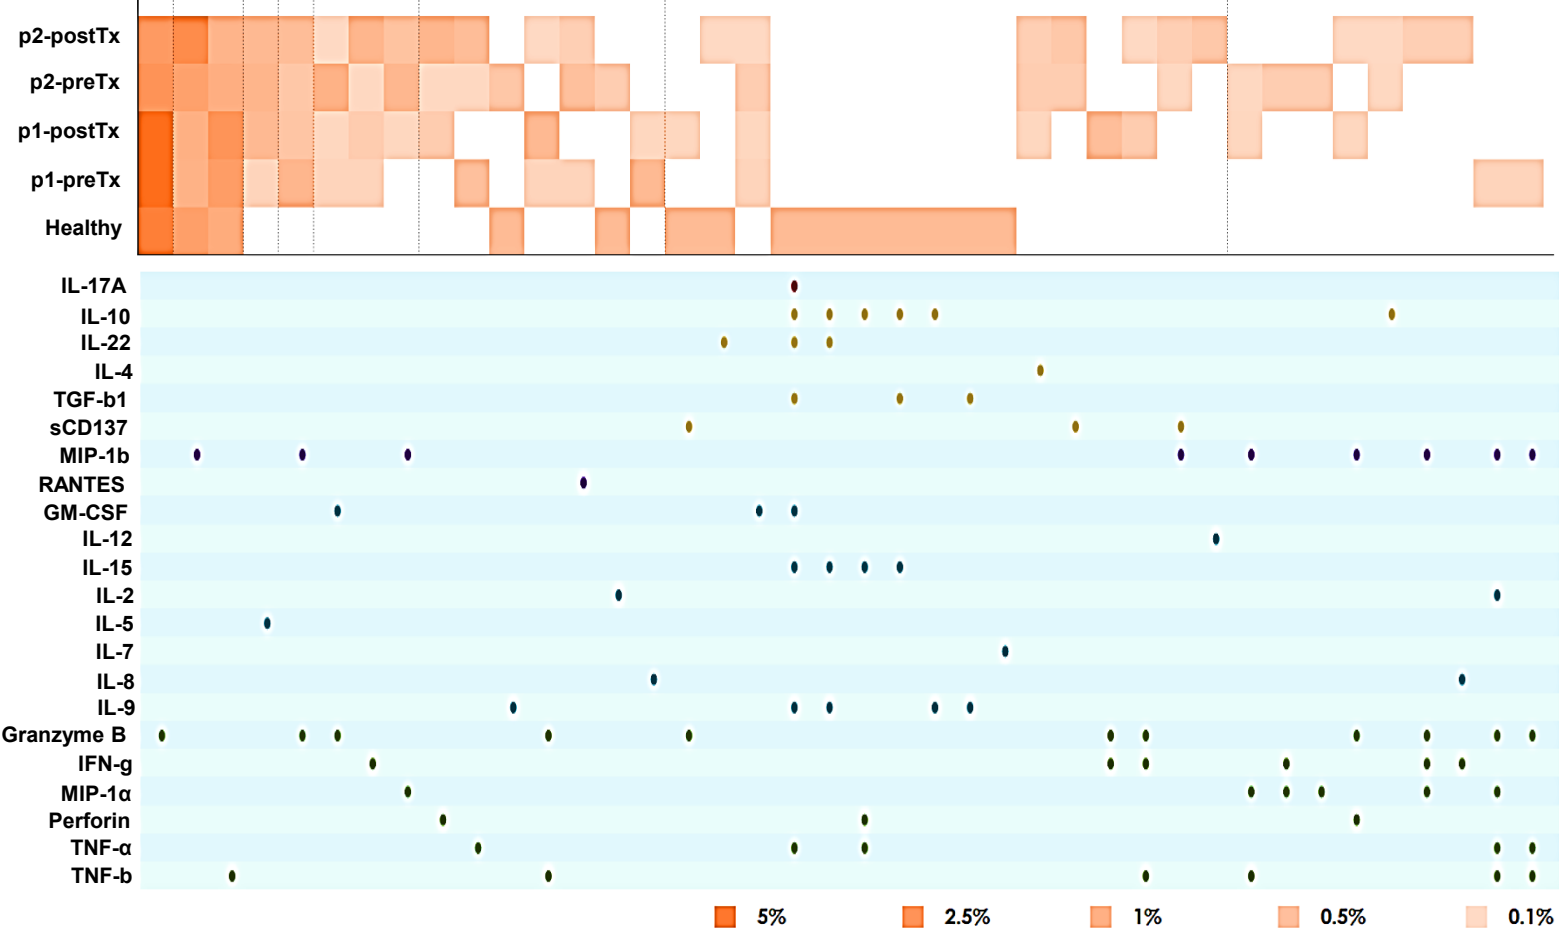



**A Spleen-tumor coculture gating strategy**

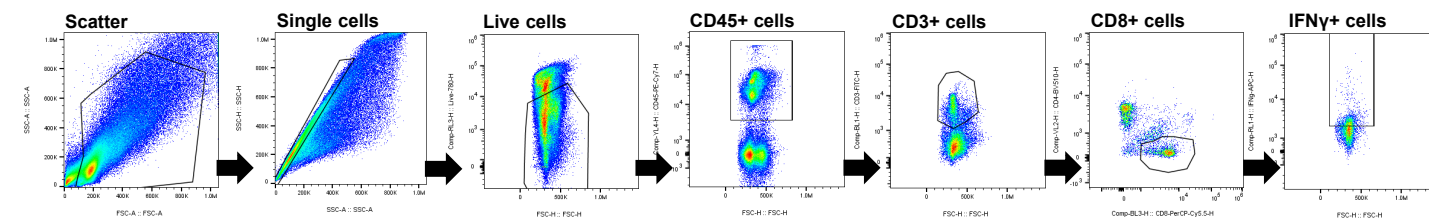

**Sorted CD8 T cell gating strategy**

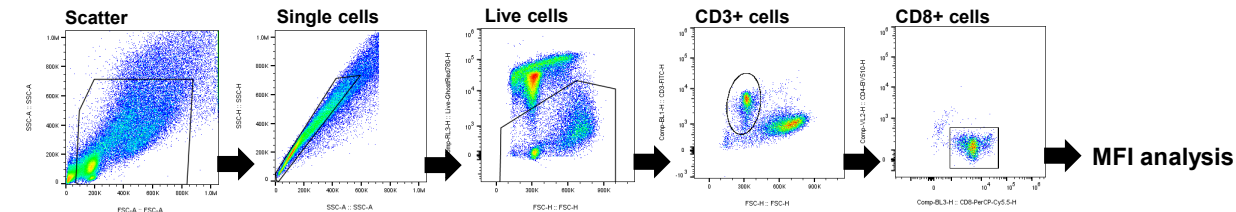

**B Blood CD8 subset gating strategy**

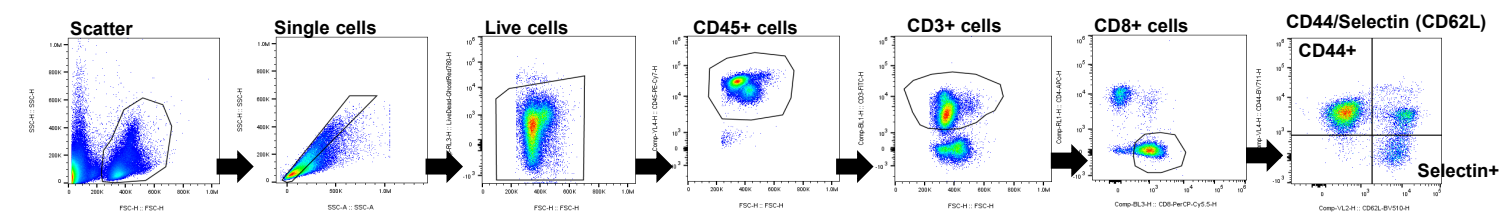

**C**

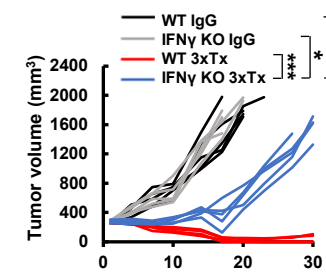

**D**

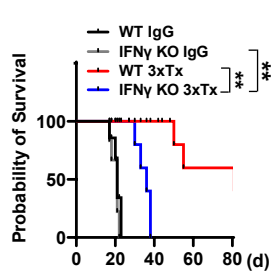

**E**

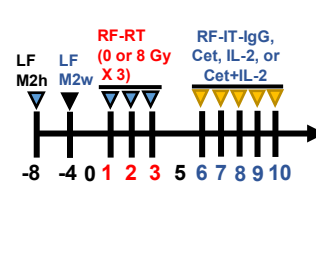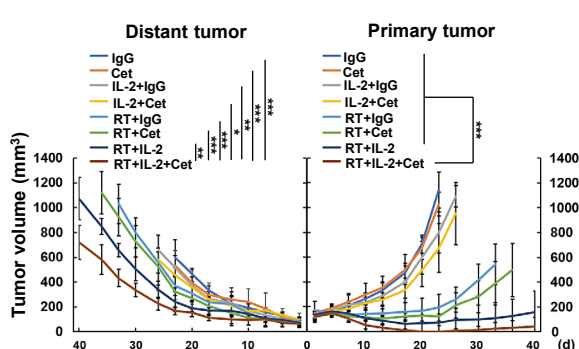

**F Tumor infiltration gating strategy**

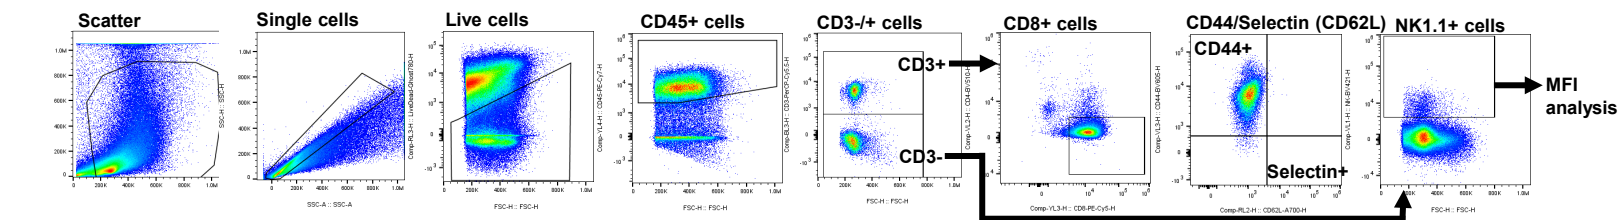

**G**

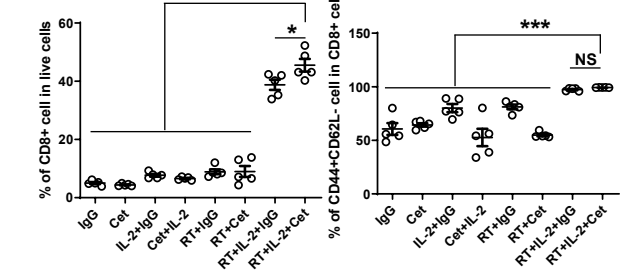

**H**

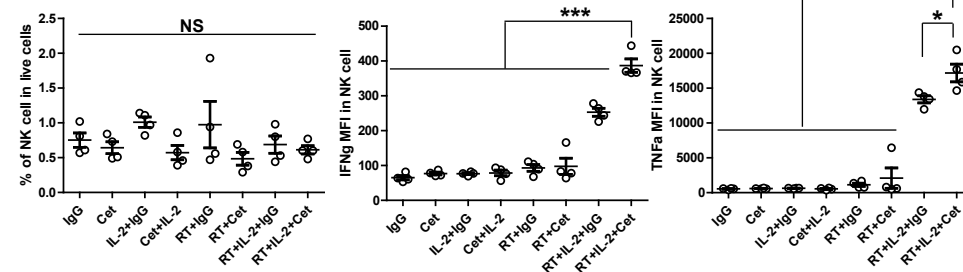

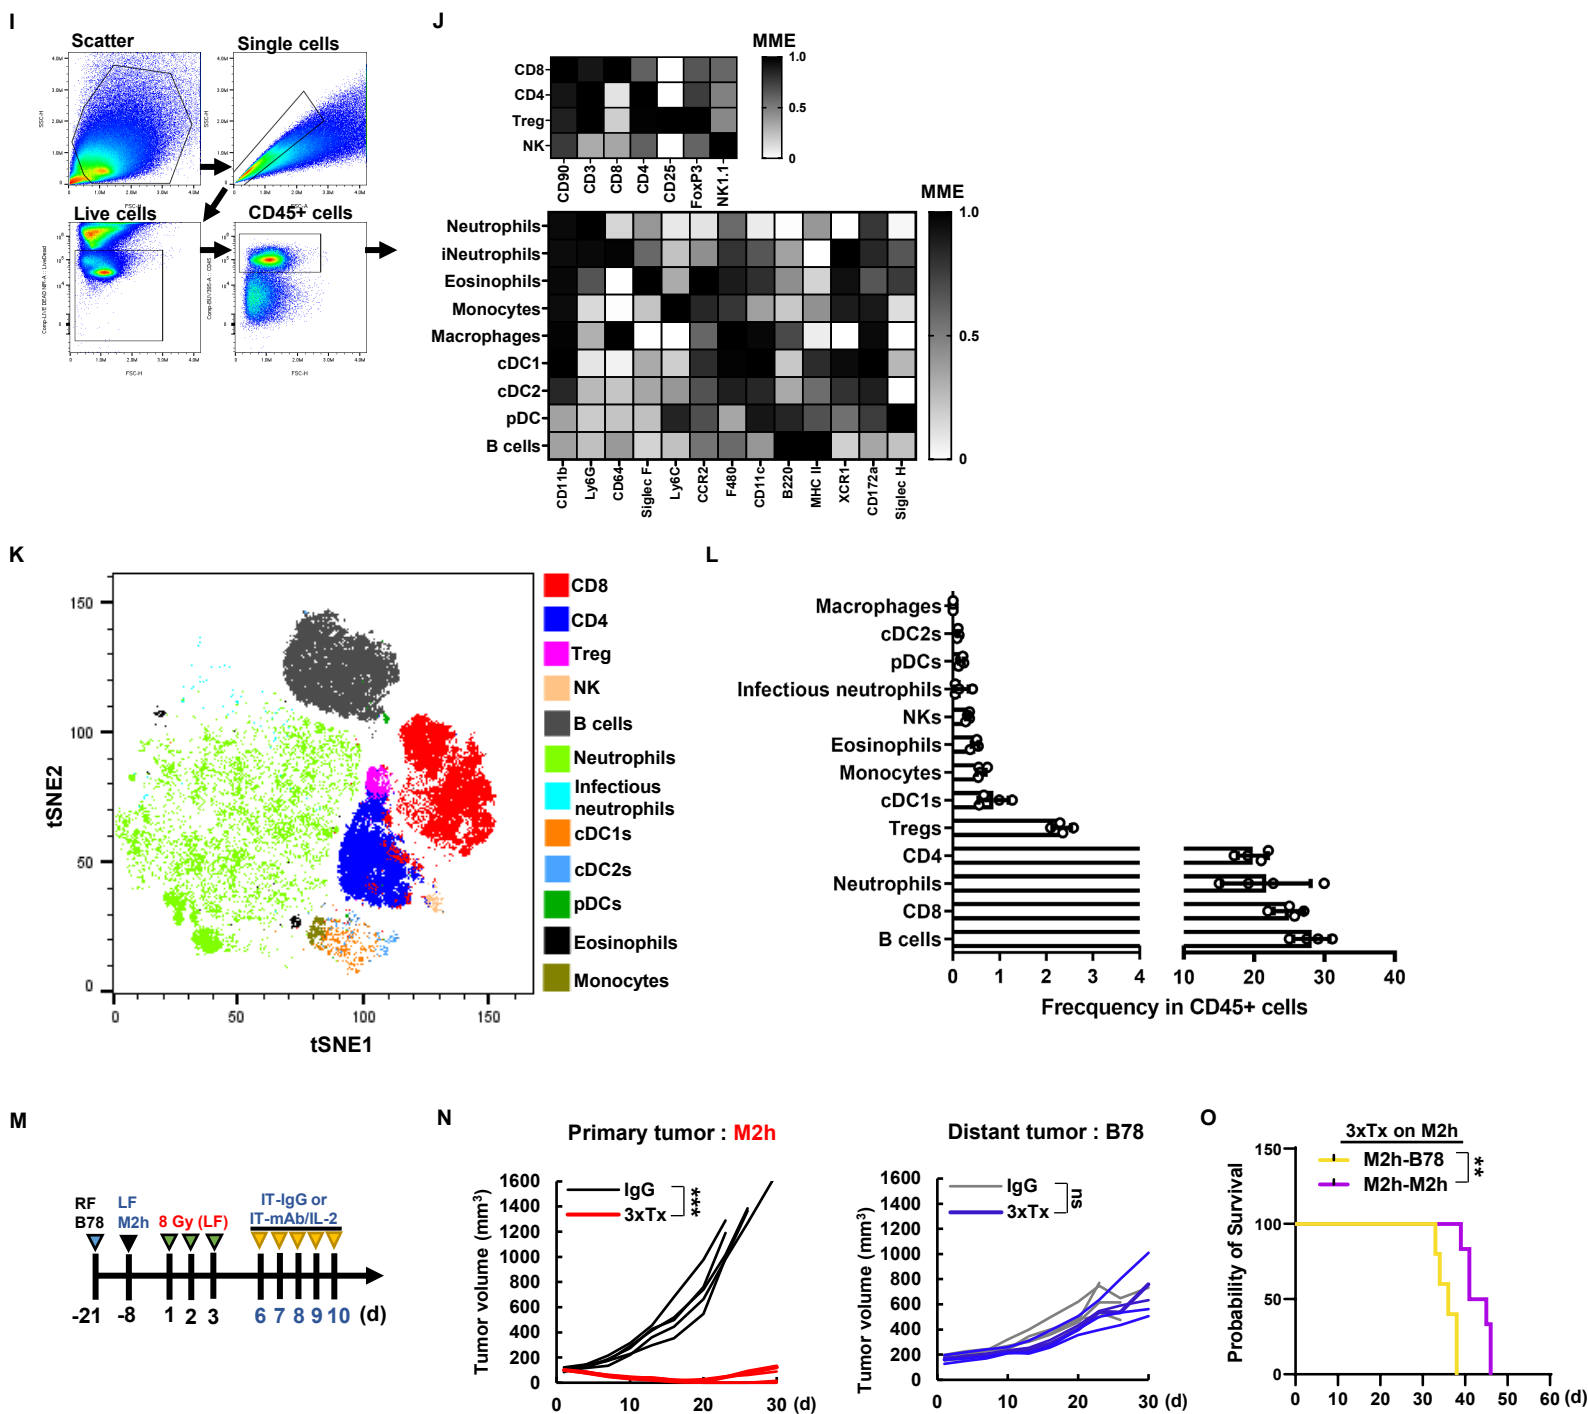

**Figure S2. Local 3xTx induces tumor-specific CD8<sup>+</sup> T cell immunity (Related to Figure 3)**

(A and B) Gating strategy of flow cytometry.

(C) Individual tumor volume and (D) survival data. (n = 5)

E-H. Bilateral tumor-bearing mice received IgG, cetuximab (Cet), IL-2, or/and RT on the primary tumor (RF-right flank).

(E) Treatment regimen (left) and mean tumor volume (right). (n = 6-8)

(F) Gating strategy of flow cytometry.

(G) Analysis of CD8<sup>+</sup> cell infiltration (left) and T<sub>em</sub> (Selectin<sup>+</sup>CD44<sup>+</sup>) of CD8<sup>+</sup> T cells. (n = 5)

(H) Analysis of NK1.1+ cell infiltration (left), IFN $\gamma$  MFI (middle), and TNF $\alpha$  MFI (right). (n = 5)

I-L, Bilateral tumor-bearing mice (RF-M2h and LF-M2w) received 3xTx on the RF and RF tumors collected on d12.

(I) Gating strategy of spectral flow cytometry for Live<sup>+</sup>CD45<sup>+</sup> cells.

(J) Immune cell classification heatmap based on the Flowsom-derived median marker expression (MME).

(K) tSNE plot of CD45<sup>+</sup> compartment.

(L) Analysis of CD45<sup>+</sup> immune compartment. (n = 4)

M-O, Bilateral tumor bearing mice (RF-B78 and LF-M2h) received IgG or 3xTx on the LF-M2h.

(M) Treatment regimen, (N) individual tumor volume, and (O) survival data. (n = 5-6)

Data represent the mean  $\pm$  SD. ns, not significant; \* $P \leq 0.05$ ; \*\* $P \leq 0.01$ ; \*\*\* $P \leq 0.001$ .

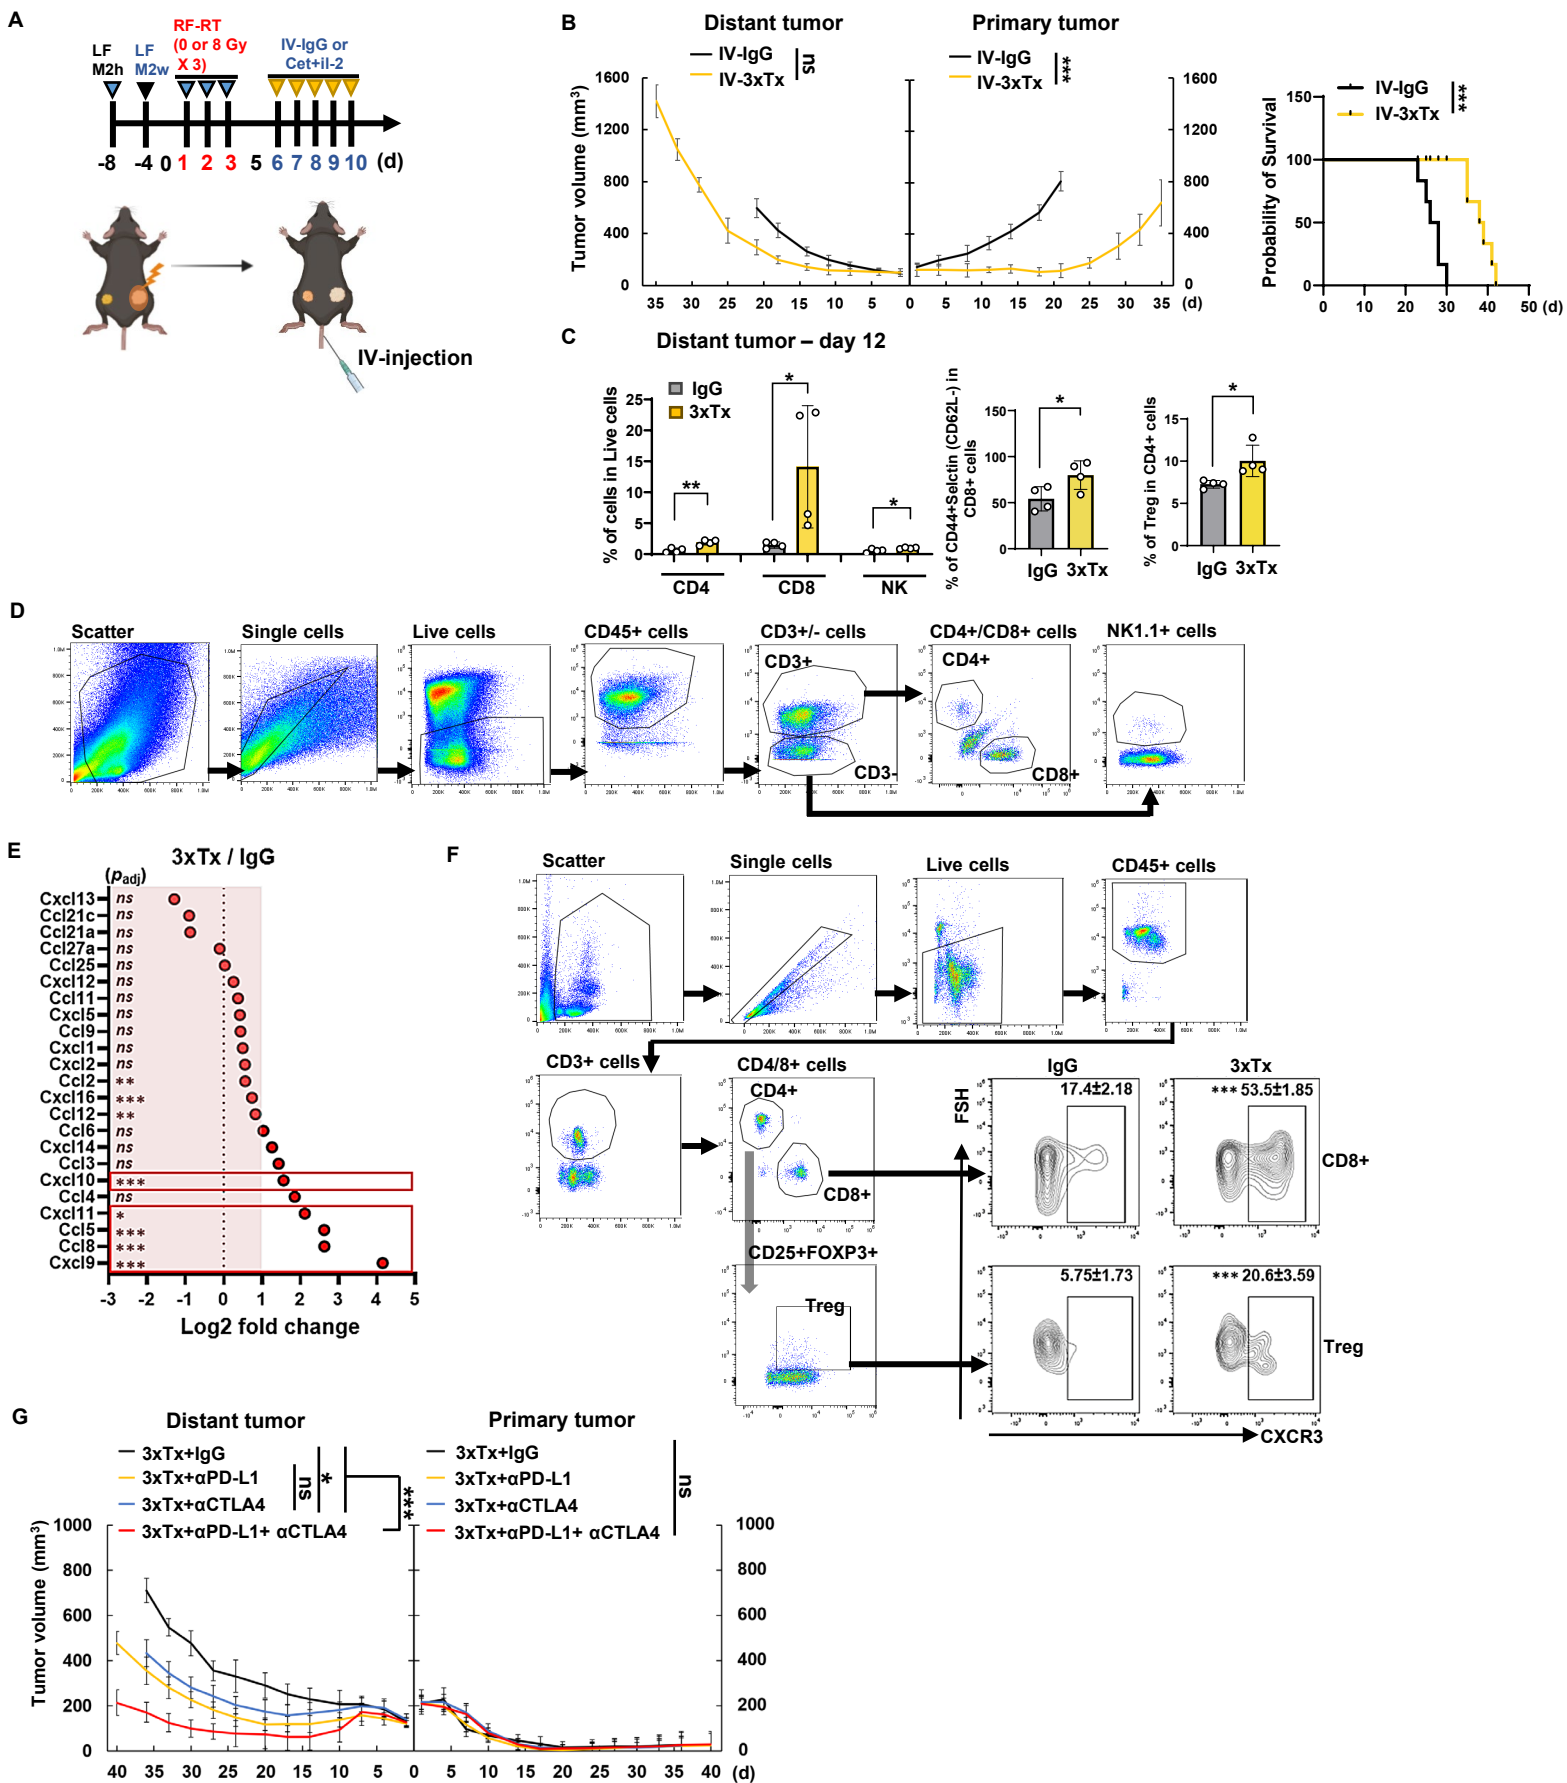

**Figure S3. 3xTx induces chemokine expression in the distant tumor and CXCR3 expression in circulating CD8<sup>+</sup> T cells and Treg (Related to Figure 4)**

A-C, Bilateral tumor-bearing mice (RF-M2h and LF-M2w) received IgG intravenously (IV-IgG) or RF-radiation, cetuximab and IL-2 intravenously (IV-3xTx).

(A) Treatment regimen.

(B) Mean tumor volume (left) and survival data (right). (n = 5)

(C) Analysis of immune cells infiltration in the distant tumor. (n = 4)

(D) Gating strategy.

(E) Analysis of chemokine gene expression in the distant tumor pooled from RNA-seq analysis. padj, adjusted p-value.

(F) Gating strategy and CXCR3-expressing cell in CD8<sup>+</sup> T cell or Treg (CD4<sup>+</sup>CD25<sup>+</sup>FOXP3<sup>+</sup>). (n = 4)

(G) Mean tumor volume from anti-PDL1 and/or anti-CTLA4 antibody treated mice. (n = 8)

All data represent the mean ± SD. ns, not significant; \*P ≤ 0.05; \*\*P ≤ 0.01; \*\*\*P ≤ 0.001.

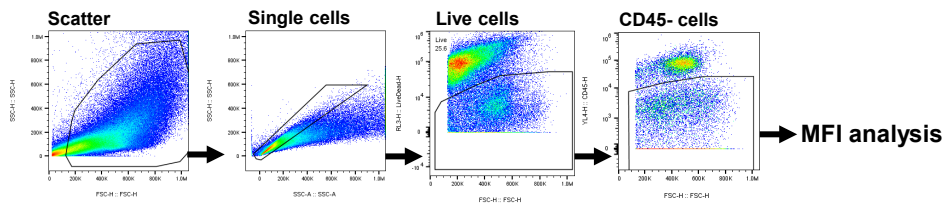

Figure S4. The gating strategy of flow cytometry (Related to Figure 5)

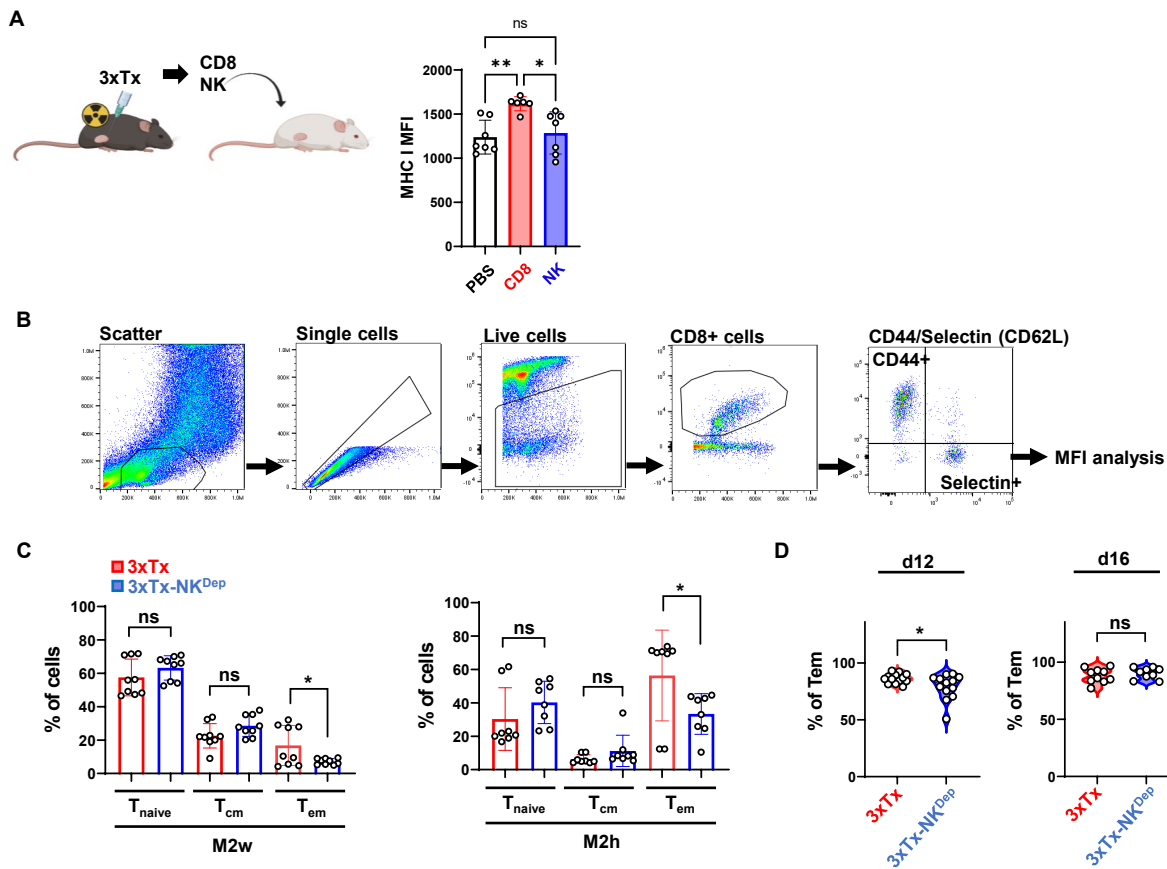

**Figure S5. Depletion of NK cells reduces CD8<sup>+</sup> T cell polyfunctionality (Related to Figure 6)**

(A) Bilateral tumor-bearing mice (RF-M2h and LF-M2w) received 3xTx on the RF. On d12, CD8<sup>+</sup> T cells or NK cells sorted from the mouse spleens were intratumorally injected in M2w-bearing immunodeficient NSG mice (left). Analysis of MHC I MFI in live<sup>+</sup>CD45<sup>-</sup> cells (right).

B and C, Bilateral tumor-bearing mice (RF-M2h and LF-M2w) received 3xTx on the RF. During treatment, IgG (3xTx) or anti-NK1.1 antibody (3xTx-NK<sup>dep</sup>) was injected intraperitoneally. On d22, CD8<sup>+</sup> T cells sorted from spleens were co-cultured with pre-plated M2w or M2h for 5 days.

(B) Gating strategy.

(C) Analysis of CD8<sup>+</sup> subset. (n = 8-9)

(D) Analysis of T<sub>em</sub> of CD8<sup>+</sup> T cells in the distant tumor. (n = 9-13)

Data represent the mean ± SD. ns, not significant; \*P ≤ 0.05; \*\*P ≤ 0.01.



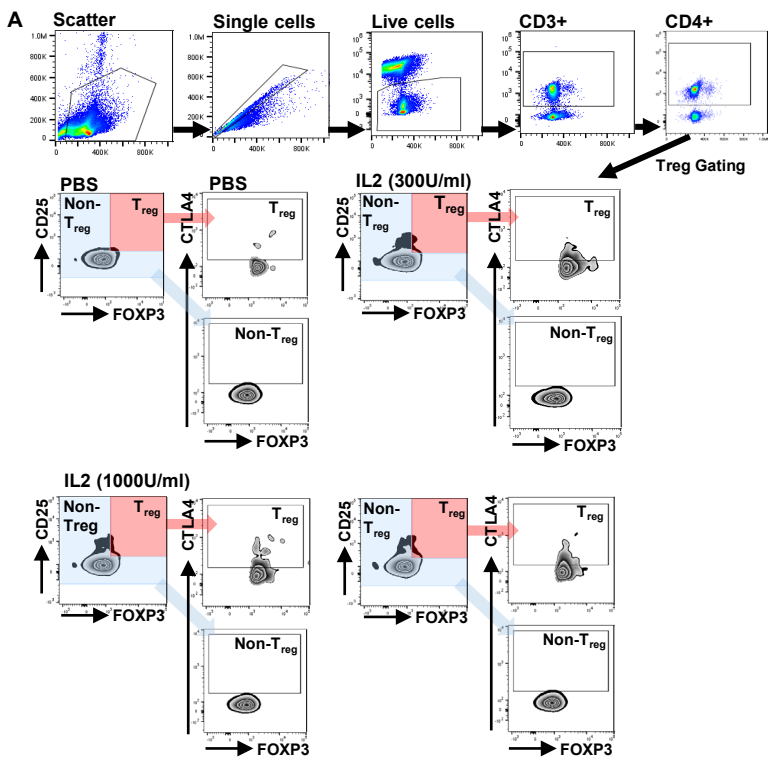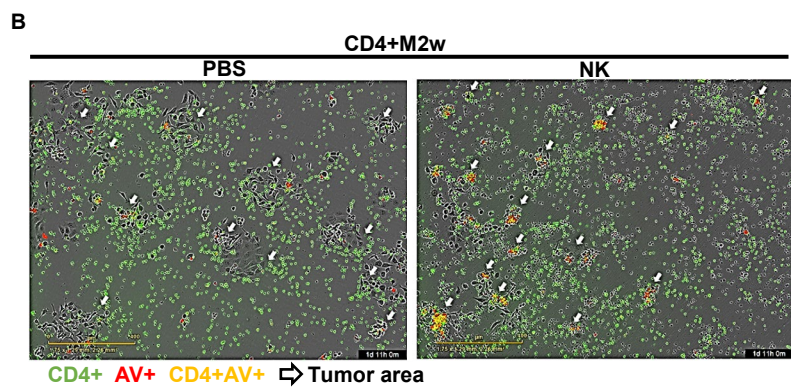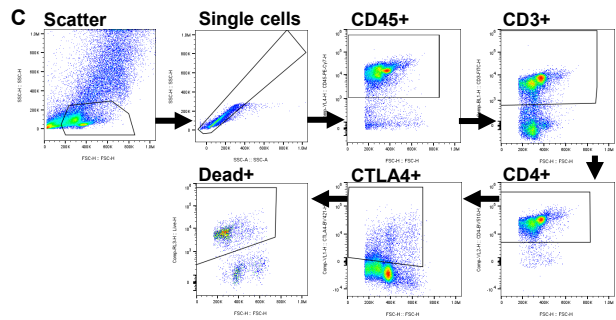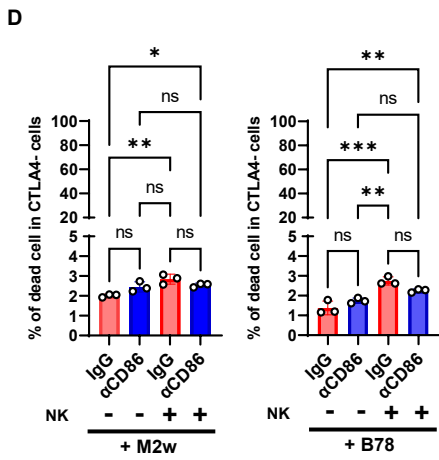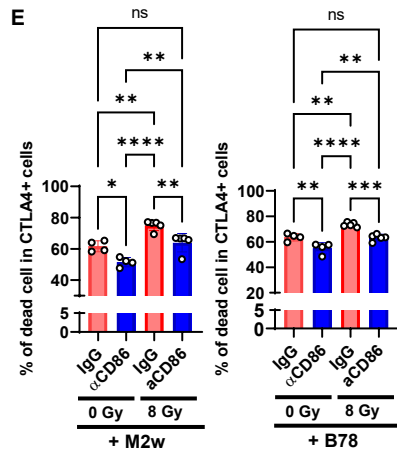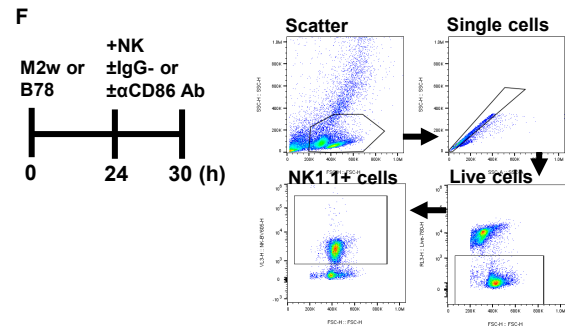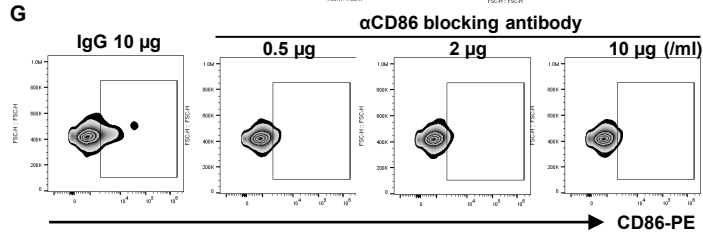

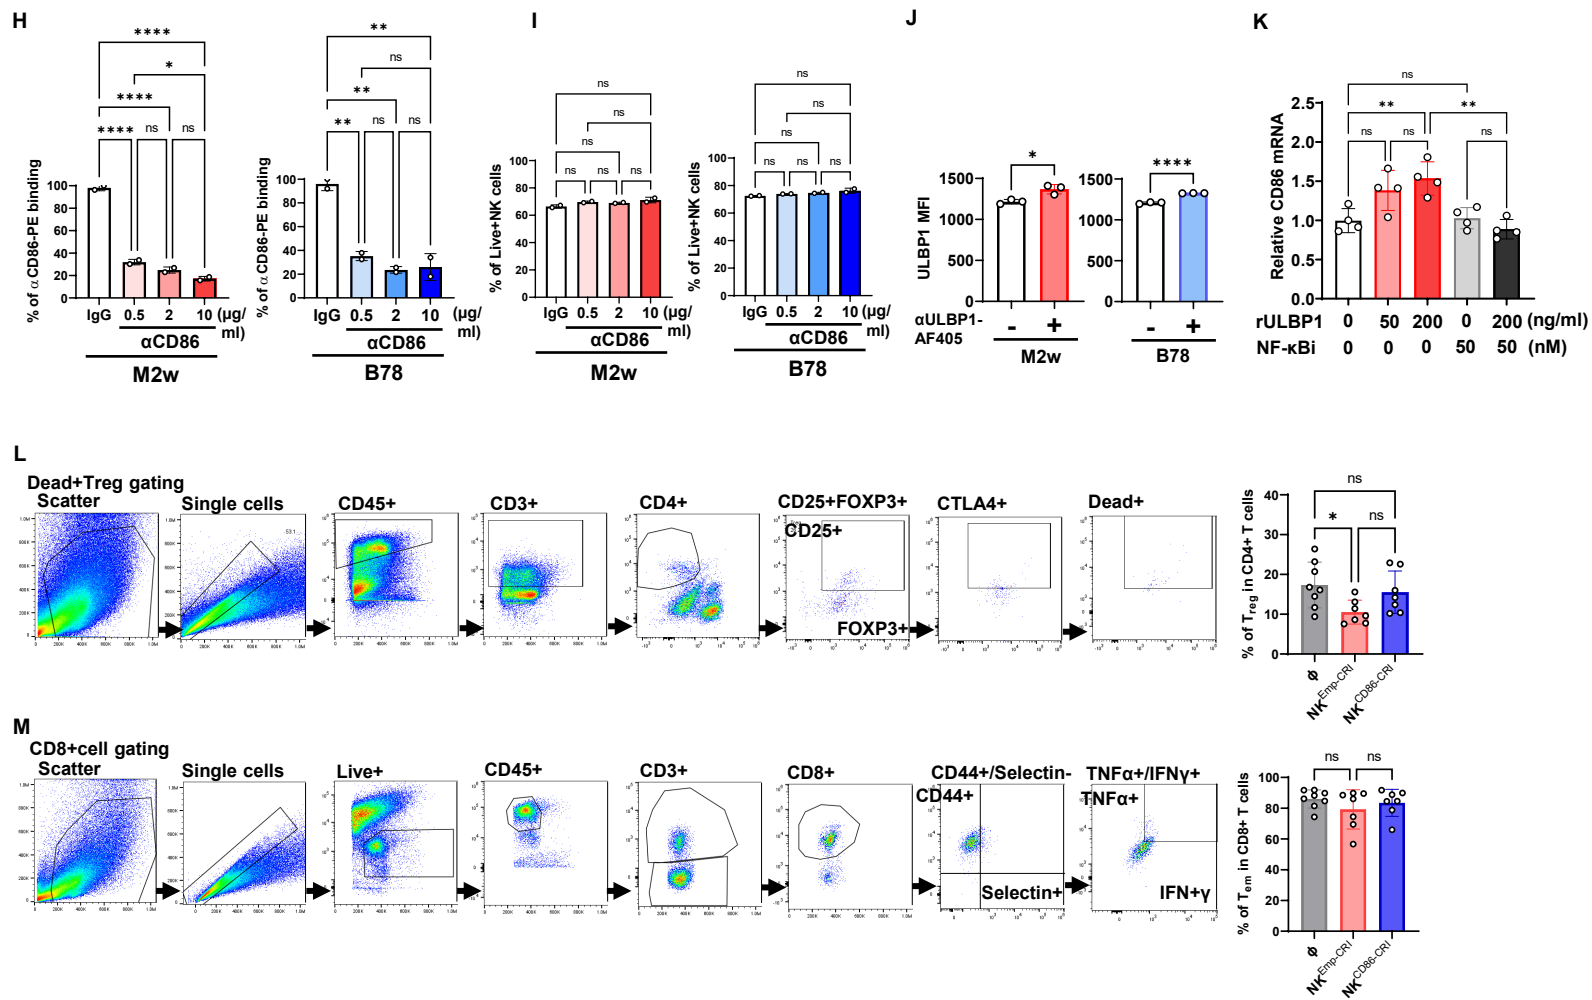

**Figure S6. NK cells antagonize CTLA4<sup>+</sup> Treg via KLRK1-CD86 axis (Related to Figure 7)**

(A) Analysis of IL2-mediated CTLA4 expression in Treg (CD4<sup>+</sup>CD25<sup>+</sup>FOXP3<sup>+</sup>)

(B) Detection of annexin V-positive cells (AV<sup>+</sup>) after NK cell coculture with IL2-stimulated CD4<sup>+</sup> T cells and M2w. Scale bar; 400 µm. Green; CD4<sup>+</sup> cells (CFSE-labeled), red; AV<sup>+</sup> cells, yellow; CD4<sup>+</sup>AV<sup>+</sup> double-positive cells.

(C) Gating strategy.

(D) Analysis of dead cells in CD4<sup>+</sup>CTLA4<sup>+</sup> cells. (n = 3)

(E) Analysis of dead cells in CD4<sup>+</sup>CTLA4<sup>+</sup> cells. (n = 4-5)

F-I. Sorted NK cells were tested in an antibody competition assay in coculture with M2w or B78.

(F) Treatment regimen (left) and gating strategy (right).

(G) CD86-positive cells gating and analysis of (H) anti-CD86-PE antibody-bound NK cells and (I) Live<sup>+</sup>NK cells. (n = 2)

(J) Analysis of ULBP MFI in tumor cells. (n = 3)

(K) Analysis of ULBP mRNA expression after recombinant ULBP1 (rULBP1) and NK-κB transcription inhibitor (NK-κBi) stimulation. (n = 4)

(L) Gating strategy (left) and analysis of T<sub>reg</sub> infiltration. (n = 7-8)

(M) Gating strategy (left) and analysis of T<sub>em</sub> infiltration. (n = 7-8)

Data represent the mean ± SD. ns, not significant; \*P ≤ 0.05; \*\*P ≤ 0.01; \*\*\*P ≤ 0.001; \*\*\*\*P ≤ 0.0001.
